# Supplementary material for: Health scores for farmed animals: Screening pig health with register data from public and private databases
Source: PubMed Central journal article supplement (PMC6999879; doi:10.1371/journal.pone.0228497), 2020-02-04

## Supplement 2: Distribution of the prevalence of meat inspection codes and their z-values in a random sample of 1,747 German pig farms in the second half of 2016

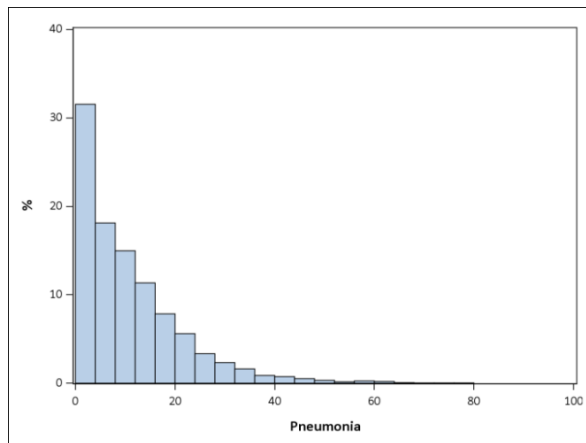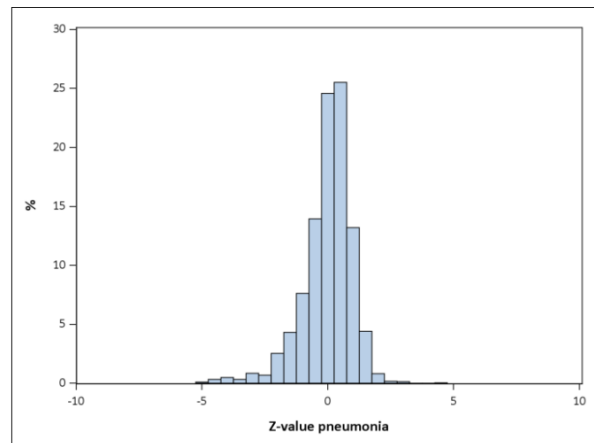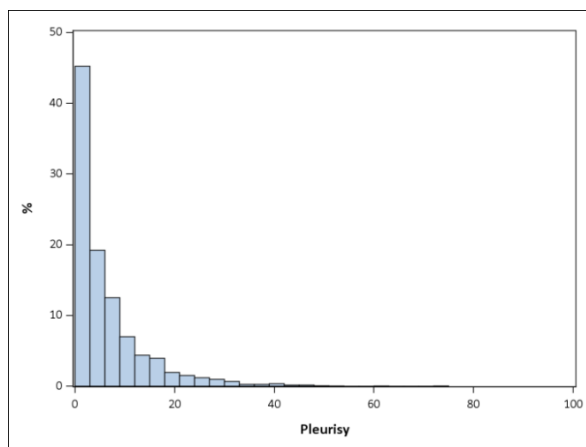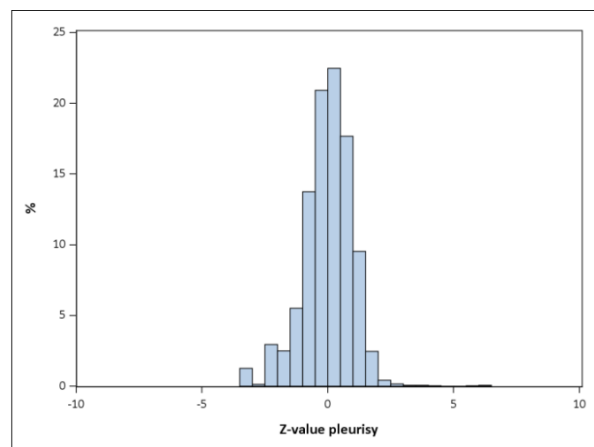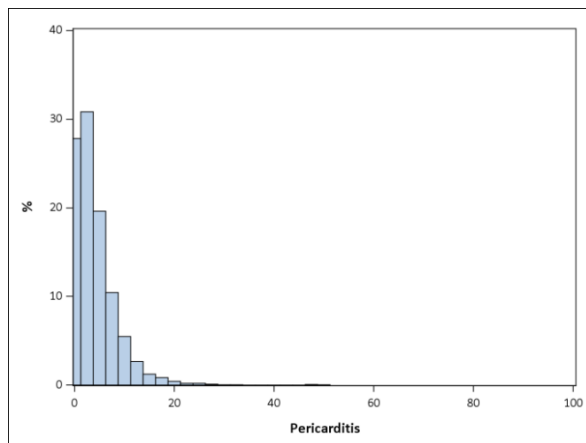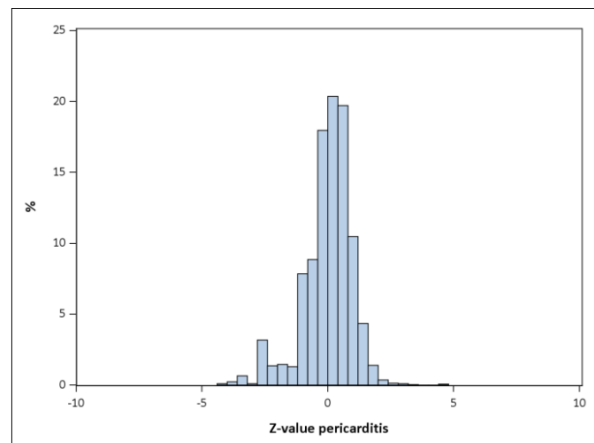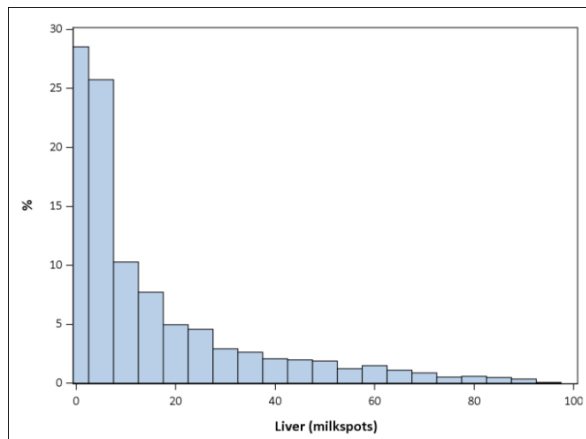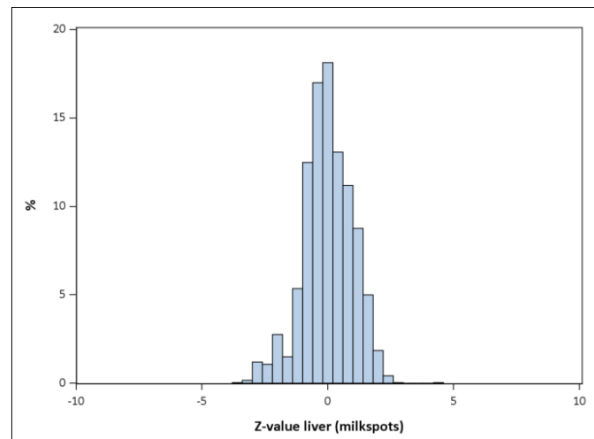

**Supplement 2: Distribution of the prevalence of meat inspection codes and their z-values in a random sample of 1,747 German pig farms in the second half of 2016**

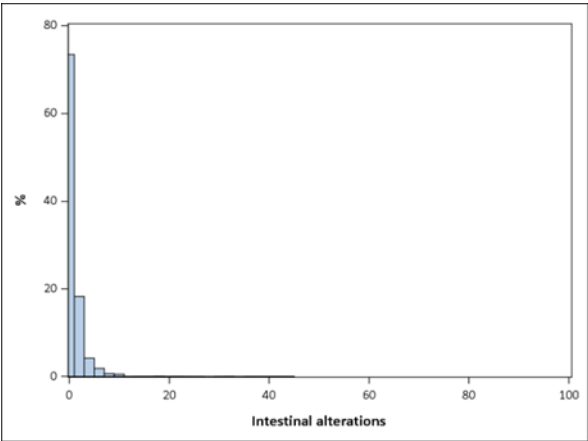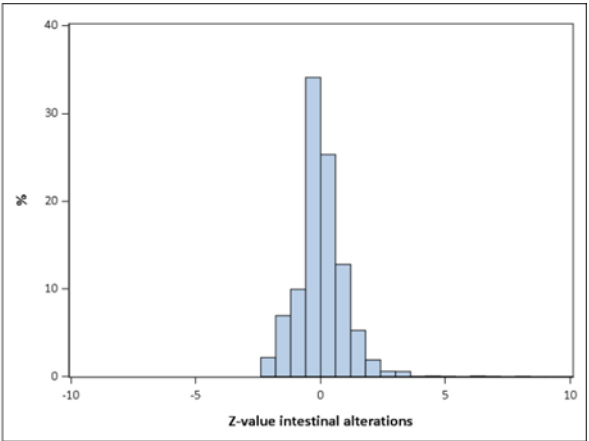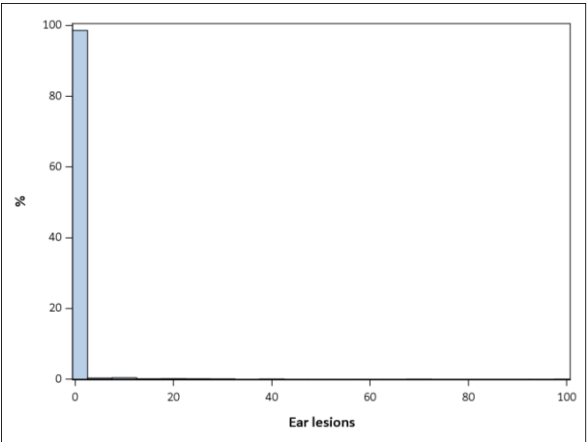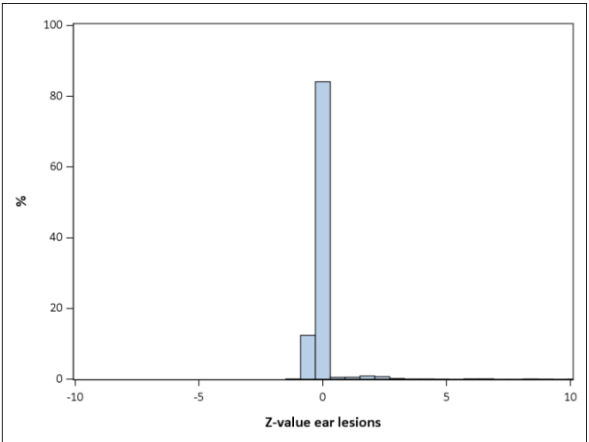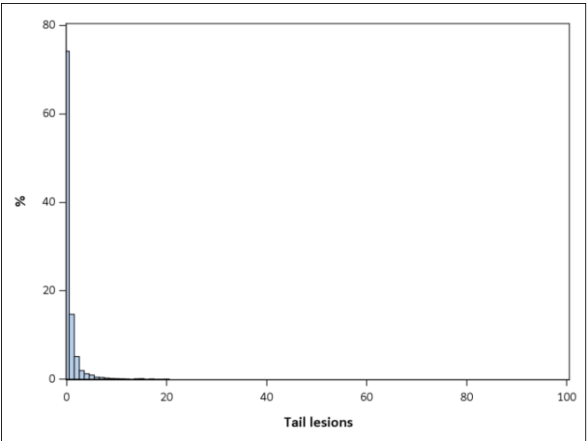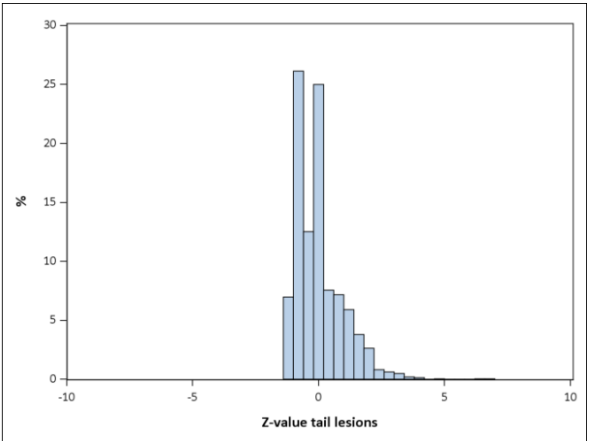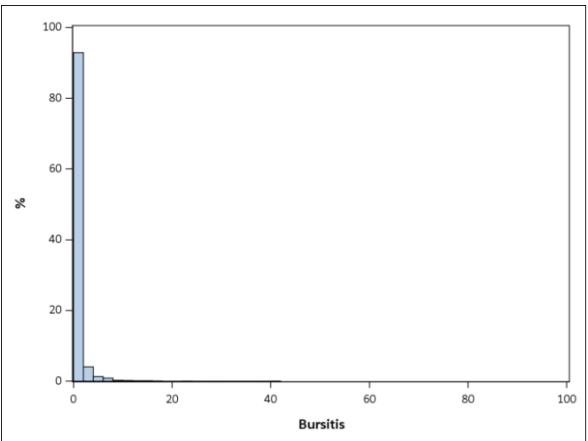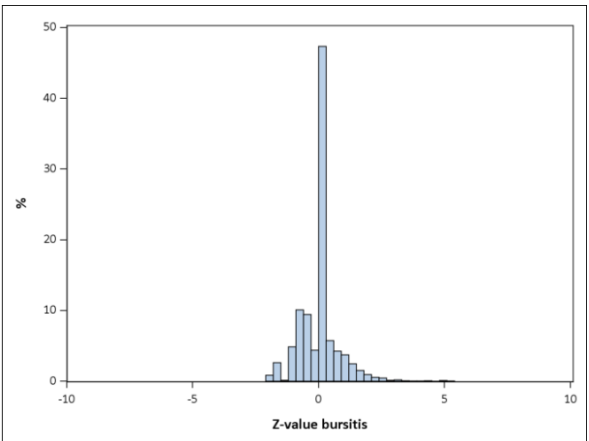

## Supplement 2: Distribution of the prevalence of meat inspection codes and their z-values in a random sample of 1,747 German pig farms in the second half of 2016

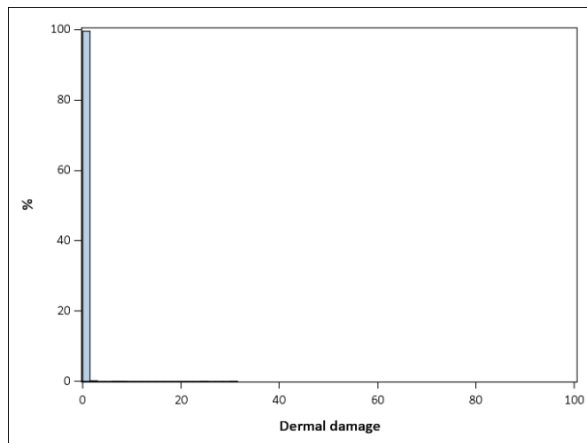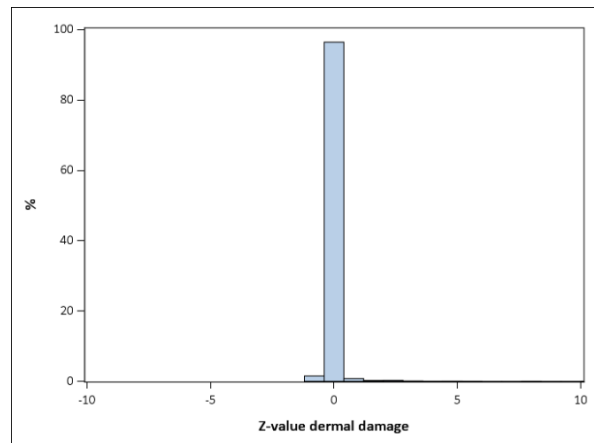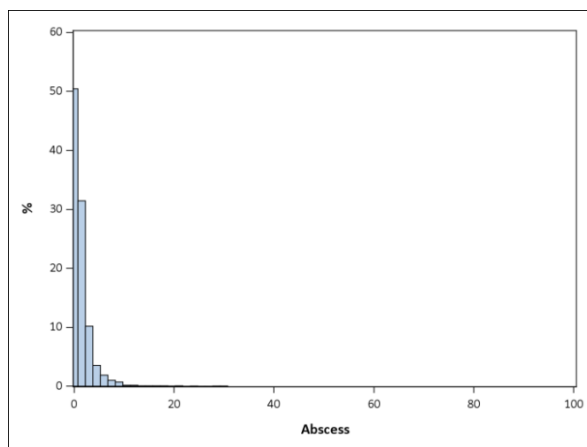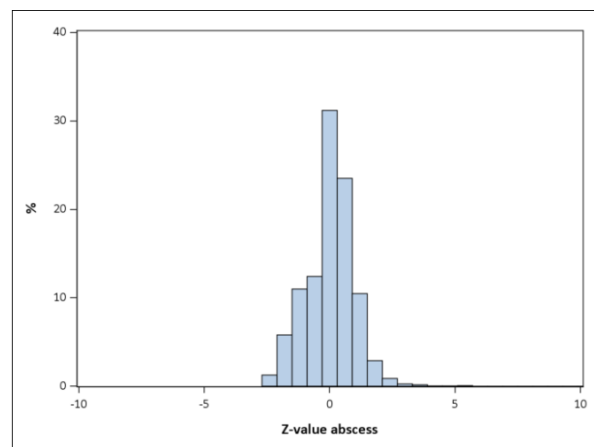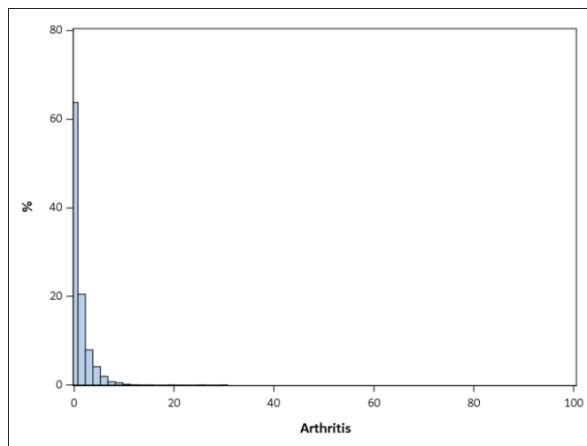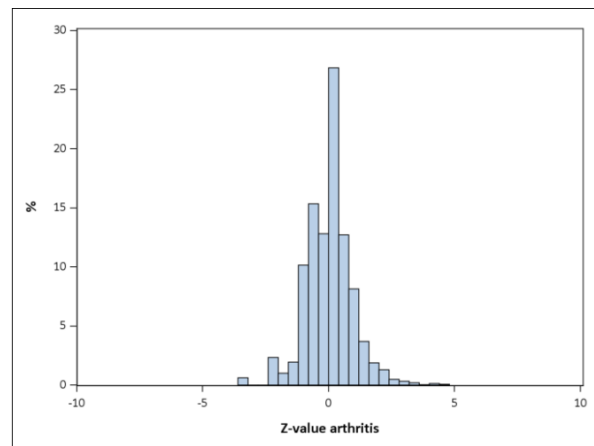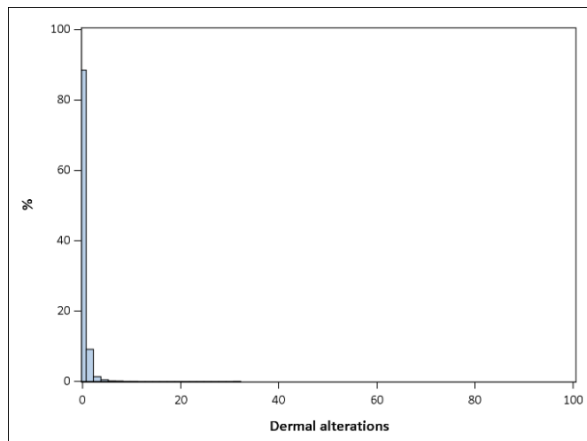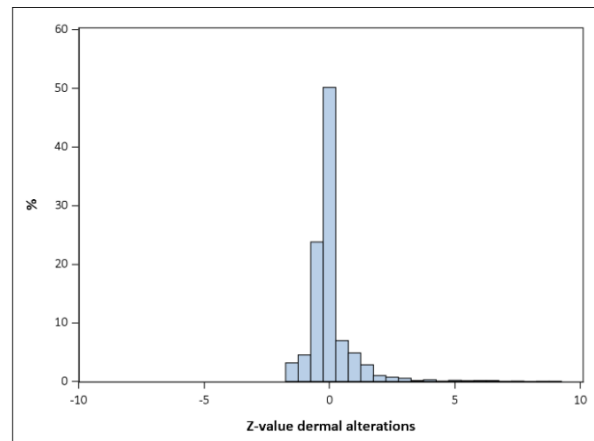

Supplement: pone.0228497.s002.pdf [file pone.0228497.s002.pdf]
