# Supplementary material for: Health scores for farmed animals: Screening pig health with register data from public and private databases
Source: PubMed Central journal article supplement (PMC6999879; doi:10.1371/journal.pone.0228497), 2020-02-04
Supplement: pone.0228497.s001.pdf [file pone.0228497.s001.pdf]

## Supplement 1: Original questionnaire for on-farm evaluation in German language

|                      |                               |                       |
|----------------------|-------------------------------|-----------------------|
| Stand:<br>25.07.2017 | PPP-InfoS Fragebogen Landwirt | Fragebogen ID:<br>L - |
|----------------------|-------------------------------|-----------------------|

### A Identifikation

A1 VVVO-Nr. / Betriebsname:

---

A2 Datum der Befragung:

---

A3 Name Interviewer:

---

A4 Name Befragter:

---

Der nachfolgende Fragebogen ist unterteilt in 5 verschiedene Fragenblöcke:

- B. Respiratorische Gesundheit
- C. Äußere Verletzungen/ Veränderungen
- D. Tiergesundheit gesamt
- E. Tiermanagement
- F. Bestandsprobleme

Jeweils zu Anfang der Fragenblöcke B – E soll der oben identifizierte Mastschweinebestand zu verschiedenen Tiergesundheitsaspekten im Vergleich zu anderen Mastschweinebeständen der Region eingeordnet werden.

Dabei bedeutet:

1. Viertel: (die 1. 25%) sehr gute bzw. die besten Betriebe in dem jeweiligen Bereich
2. Viertel: (die 2. 25%) gute Betriebe in dem jeweiligen Bereich
3. Viertel: (die 3. 25%) mäßige Betriebe in dem jeweiligen Bereich
4. Viertel: (die 4. 25%) schlechteste Betriebe in dem jeweiligen Bereich

Bei einigen Fragen wird zusätzlich zu den Antwortmöglichkeiten um eine Prävalenzschätzung (Schätzung der Krankheitshäufigkeit) gebeten. Hier ist eine Prozentangabe erforderlich und in die farblich grün hervorgehobenen Felder einzutragen.

|                      |                               |                       |
|----------------------|-------------------------------|-----------------------|
| Stand:<br>25.07.2017 | PPP-InfoS Fragebogen Landwirt | Fragebogen ID:<br>L - |
|----------------------|-------------------------------|-----------------------|

### B Respiratorische Gesundheit (Atemwegsgesundheit)

Die Atemwegsgesundheit Ihrer Mastschweine das 2. Halbjahr 2016 rückblickend betrachtend:

B1 Wo würden Sie Ihren Mastschweinebestand im Vergleich zu den anderen Mastbetrieben der Landkreise Vechta und Cloppenburg einordnen?

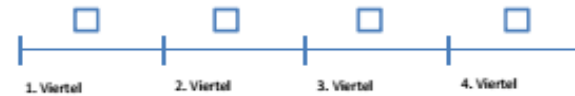

- Ich möchte dazu keine Einschätzung abgeben.
- Ich kann dazu keine Einschätzung abgeben, weil ich es nicht weiß.

B2 Zeigten Ihre Mastschweine Symptome einer Atemwegserkrankung (Niesen, Nasenausfluss, Husten, Atemnot)?

- nein      Prävalenzschätzung:
- selten
- gelegentlich
- häufig
- Ich möchte dazu keine Einschätzung abgeben.
- Ich kann dazu keine Einschätzung abgeben, weil ich es nicht weiß.

## Supplement 1: Original questionnaire for on-farm evaluation in German language

|                      |                               |                       |
|----------------------|-------------------------------|-----------------------|
| Stand:<br>25.07.2017 | PPP-InfoS Fragebogen Landwirt | Fragebogen ID:<br>L - |
|----------------------|-------------------------------|-----------------------|

### C Äußere Verletzungen/ Veränderungen

Das Auftreten von äußeren Verletzungen/Veränderungen (wie z.B. Schwanzverletzungen, Hauterkrankungen oder Abszesse) Ihrer Mastschweine das 2. Halbjahr 2016 rückblickend betrachtend:

C1 Wo würden Sie Ihren Mastschweinebestand im Vergleich zu den anderen Mastbetrieben der Landkreise Vechta und Cloppenburg einordnen?

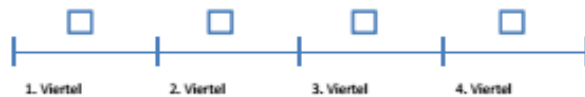

- Ich möchte dazu keine Einschätzung abgeben.  
 Ich kann dazu keine Einschätzung abgeben, weil ich es nicht weiß.

C2 Zeigten Ihre Mastschweine folgende Veränderungen:

Nabelbrüche

- nein  selten  gelegentlich  häufig

Prävalenzschätzung:

Ohrtrandnekrosen

- nein  selten  gelegentlich  häufig

Prävalenzschätzung:

Schwanznekrosen

- nein  selten  gelegentlich  häufig

Prävalenzschätzung:

|                      |                               |                       |
|----------------------|-------------------------------|-----------------------|
| Stand:<br>25.07.2017 | PPP-InfoS Fragebogen Landwirt | Fragebogen ID:<br>L - |
|----------------------|-------------------------------|-----------------------|

Flankenbeißen

- nein  selten  gelegentlich  häufig

Prävalenzschätzung:

Gelenkentzündungen

- nein  selten  gelegentlich  häufig

Prävalenzschätzung:

Liegebeulen (mit Durchmesser > 5cm)

- nein  selten  gelegentlich  häufig

Prävalenzschätzung:

Abszesse

- nein  selten  gelegentlich  häufig

Prävalenzschätzung:

Hauterkrankungen

- nein  selten  gelegentlich  häufig

Prävalenzschätzung:

Generell:

- Ich möchte dazu keine Einschätzung abgeben.  
 Ich kann dazu keine Einschätzung abgeben, weil ich es nicht weiß.

## Supplement 1: Original questionnaire for on-farm evaluation in German language

|                      |                               |                       |
|----------------------|-------------------------------|-----------------------|
| Stand:<br>25.07.2017 | PPP-InfoS Fragebogen Landwirt | Fragebogen ID:<br>L - |
|----------------------|-------------------------------|-----------------------|

### D Tiergesundheit gesamt

Die Gesundheit Ihrer Mastschweine als Gesamtzustand für das 2. Halbjahr 2016 rückblickend betrachtend:

D1 Wo würden Sie Ihren Mastschweinebestand im Vergleich zu den anderen Mastbetrieben der Landkreise Vechta und Cloppenburg einordnen?

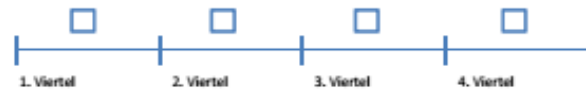

- Ich möchte dazu keine Einschätzung abgeben.  
 Ich kann dazu keine Einschätzung abgeben, weil ich es nicht weiß.

D2 Hatten Sie in Ihrem Mastschweinebestand Probleme mit Kümmerern?  
(Definition: unterdurchschnittliches Wachstum + schlechter Gesundheitszustand)

- nein      Prävalenzschätzung:
- selten
- gelegentlich
- häufig
- Ich möchte dazu keine Einschätzung abgeben.
- Ich kann dazu keine Einschätzung abgeben, weil ich es nicht weiß.

D3 Hatten sie Probleme mit ungleichmäßigem Wachstum (Auseinanderwachsen) der Tiere

- nein      Prävalenzschätzung:
- selten
- gelegentlich
- häufig
- Ich möchte dazu keine Einschätzung abgeben.
- Ich kann dazu keine Einschätzung abgeben, weil ich es nicht weiß.

|                      |                               |                       |
|----------------------|-------------------------------|-----------------------|
| Stand:<br>25.07.2017 | PPP-InfoS Fragebogen Landwirt | Fragebogen ID:<br>L - |
|----------------------|-------------------------------|-----------------------|

D4 Zeigten Ihre Mastschweine Symptome einer Durchfallerkrankung?

- nein      Prävalenzschätzung:
- selten
- gelegentlich
- häufig
- Ich möchte dazu keine Einschätzung abgeben.
- Ich kann dazu keine Einschätzung abgeben, weil ich es nicht weiß.

D5 Zeigten Ihre Mastschweine Symptome einer Gelenkerkrankung (Lahmheit, dicke Gelenke)?

- nein      Prävalenzschätzung:
- selten
- gelegentlich
- häufig
- Ich möchte dazu keine Einschätzung abgeben.
- Ich kann dazu keine Einschätzung abgeben, weil ich es nicht weiß.

D6 Zeigten Ihre Mastschweine Symptome einer Erkrankung des Nervensystems  
(z.B. Kreisbewegungen, Rudern in Seitenlage, Krämpfe)?

- nein      Prävalenzschätzung:
- selten
- gelegentlich
- häufig
- Ich möchte dazu keine Einschätzung abgeben.
- Ich kann dazu keine Einschätzung abgeben, weil ich es nicht weiß.

## Supplement 1: Original questionnaire for on-farm evaluation in German language

|                      |                               |                       |
|----------------------|-------------------------------|-----------------------|
| Stand:<br>25.07.2017 | PPP-InfoS Fragebogen Landwirt | Fragebogen ID:<br>L - |
|----------------------|-------------------------------|-----------------------|

D7 Welche Krankheitserreger wurden im 2. Halbjahr 2016 bei Ihren Mastschweinen nachgewiesen? (Mehrfachnennung möglich)

Erreger von Atemwegserkrankungen:

- APP     HPS     Mykoplasmen (M. hyo.)  
 Influenzaviren     PRRSV     PCV2  
 Streptokokken     Pasteurellen     Bordetellen  
 keine     ich weiß nicht     Andere: \_\_\_\_\_

Erreger von Darminfektionen

- Lawsonien     Brachyspiren     Salmonellen  
 E. coli     Rotaviren     Coronaviren  
 keine     ich weiß nicht     Andere: \_\_\_\_\_

Erreger von Gelenkerkrankungen

- HPS     Streptokokken     Staphylokokken  
 E. coli     M. hyorhinis     M. hyosynoviae  
 keine     ich weiß nicht     Andere: \_\_\_\_\_

Erreger anderer Erkrankungskomplexe

- keine     ich weiß nicht     Welche: \_\_\_\_\_

Generell:

- Ich möchte dazu keine Einschätzung abgeben.  
 Ich kann dazu keine Einschätzung abgeben, weil ich es nicht weiß.

|                      |                               |                       |
|----------------------|-------------------------------|-----------------------|
| Stand:<br>25.07.2017 | PPP-InfoS Fragebogen Landwirt | Fragebogen ID:<br>L - |
|----------------------|-------------------------------|-----------------------|

### E Tiermanagement

Ihr Tiermanagement (z.B. Handling, Biosicherheit, Entwurmungskonzept) das 2. Halbjahr 2016 rückblickend betrachtend:

E1 Wo würden Sie sich im Vergleich zu den anderen Mastbetrieben der Landkreise Vechta und Cloppenburg einordnen?

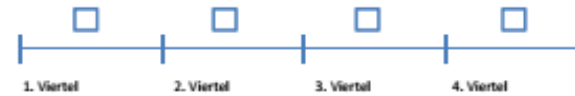

- Ich möchte dazu keine Einschätzung abgeben.  
 Ich kann dazu keine Einschätzung abgeben, weil ich es nicht weiß.

E2 Fahren Sie in Ihrem Bestand ein Rein-Raus-System?

- Ja, pro Stall  
 Ja, pro Abteil  
 Nein  
 Ich möchte dazu keine Einschätzung abgeben.  
 Ich kann dazu keine Einschätzung abgeben, weil ich es nicht weiß.

## Supplement 1: Original questionnaire for on-farm evaluation in German language

|                      |                               |                       |
|----------------------|-------------------------------|-----------------------|
| Stand:<br>25.07.2017 | PPP-InfoS Fragebogen Landwirt | Fragebogen ID:<br>L - |
|----------------------|-------------------------------|-----------------------|

---

Die nachfolgenden Fragen werden offen formuliert.

Die Antwortmöglichkeiten werden **nicht** mit verlesen.

Anhand der Antwort des Befragten entscheidet der Interviewer, ob eine der vorformulierten Antwortmöglichkeiten zutreffend ist oder ob ein Freitextfeld genutzt werden sollte.

---

E3 Wie oft reinigen Sie Ihren Stall?

- Nach jedem Durchgang
- Ab und zu
- Andere Antwort: \_\_\_\_\_
- Nein
- Ich möchte dazu keine Einschätzung abgeben.
- Ich kann dazu keine Einschätzung abgeben, weil ich es nicht weiß.

E4 Wie oft desinfizieren Sie Ihren Stall?

- Nach jedem Durchgang
  - Ab und zu
  - Andere Antwort: \_\_\_\_\_
  - Nein
  - Ich möchte dazu keine Einschätzung abgeben.
  - Ich kann dazu keine Einschätzung abgeben, weil ich es nicht weiß.
- 

|                      |                               |                       |
|----------------------|-------------------------------|-----------------------|
| Stand:<br>25.07.2017 | PPP-InfoS Fragebogen Landwirt | Fragebogen ID:<br>L - |
|----------------------|-------------------------------|-----------------------|

E5 Haben sie eine Absonderungsmöglichkeit für kranke Tiere?

- Ja, einen Krankenstall
  - Ja, ein Krankenabteil
  - Ja, eine Krankenbucht
  - Andere Antwort: \_\_\_\_\_
  - Nein
  - Ich möchte dazu keine Einschätzung abgeben.
  - Ich kann dazu keine Einschätzung abgeben, weil ich es nicht weiß.
- 

E6 Wie oft beobachten Sie Ihre Tiere?

- <1x/Tag     1x/Tag     2x/Tag     >2x/Tag
- Andere Antwort: \_\_\_\_\_
- Ich möchte dazu keine Einschätzung abgeben.
- Ich kann dazu keine Einschätzung abgeben, weil ich es nicht mehr weiß.

E7 Treiben Sie Ihre Tiere dabei auf?     Ja     Nein

---

E8 Wie ist Ihr Entwurmungsmanagement bzw. wurden Ihre Tiere vor der Eistellung in die Mast entwurmt?

- Der Ferkelaufzüchter entwurmt während der Aufzucht und dies halte ich für ausreichend.
- Ich entwurme standardmäßig während der Mast.
- Wenn beim letzten Durchgang viele Lebern verworfen wurden, entwurme ich beim darauffolgenden Durchgang.
- Ich habe kein Entwurmungsmanagement
- Andere Antwort: \_\_\_\_\_
- Ich möchte dazu keine Einschätzung abgeben.
- Ich kann dazu keine Einschätzung abgeben, weil ich es nicht weiß.

## Supplement 1: Original questionnaire for on-farm evaluation in German language

|                      |                               |                       |
|----------------------|-------------------------------|-----------------------|
| Stand:<br>25.07.2017 | PPP-InfoS Fragebogen Landwirt | Fragebogen ID:<br>L - |
|----------------------|-------------------------------|-----------------------|

E9 Wie stehen Sie zum Thema Diagnostik?

- Diagnostik halte ich für wichtig und frage den Tierarzt danach.
- Diagnostik möchte ich eher vermeiden, lasse mich aber von meinem Tierarzt beraten.
- Diagnostik kommt für mich nur im Notfall in Frage.
- Diagnostik ist mir zu teuer und hat zu wenig Aussagekraft
- Andere Antwort: \_\_\_\_\_
- Ich möchte dazu keine Einschätzung abgeben.
- Ich kann dazu keine Einschätzung abgeben, weil ich es nicht weiß.

E10 Wie sieht Ihr Impfkonzept aus? Werden Impfungen vor der Einstellung in die Mast an Ihren Tieren durchgeführt?

- Mein Impfkonzept steht schon seit vielen Jahren.
- Mein Impfkonzept bespreche ich mit meinem Tierarzt und passe es gegebenenfalls an.
- Mein Impfkonzept bespreche ich mit meinem Ferkelaufzüchter und Tierarzt und passe es gegebenenfalls an.
- Mein Impfkonzept besteht darin, nicht zu impfen, da Impfungen mir zu aufwendig und teuer sind.
- Andere Antwort: \_\_\_\_\_
- Ich möchte dazu keine Einschätzung abgeben.
- Ich kann dazu keine Einschätzung abgeben, weil ich es nicht weiß.

|                      |                               |                       |
|----------------------|-------------------------------|-----------------------|
| Stand:<br>25.07.2017 | PPP-InfoS Fragebogen Landwirt | Fragebogen ID:<br>L - |
|----------------------|-------------------------------|-----------------------|

### F Bestandsprobleme

F1 Was ist Ihr hauptsächliches Bestandsproblem und gibt es zudem noch weitere Bestandsprobleme?  
(Antwort in Stichpunkten)

F2 Gibt es in Ihrem Betrieb bestimmte Bestandsprobleme, die immer wieder auftauchen?  
Wenn ja, welche?  
(Antwort in Stichpunkten)
